# Supplementary material for: Application of syringe to syringe dispersive micro-solid phase extraction using a magnetic layered double hydroxide for the determination of cadmium(ii) and lead(ii) ions in food and water samples
Source: Royal Society of Chemistry journal article supplement (doi:10.1039/c7ay01857f), 2018-01-01
Supplement: c7ay01857f1.pdf [file c7ay01857f1.pdf]

### 3.1.6. FAAS evaluation

Flame atomic absorption spectrometry (FAAS) was used to assess the atomic composition of  $\text{Fe}_3\text{O}_4@\text{Ni-Al-CO}_3\text{-LDH}$ . For this purpose, 30 mg of the nanosorbent was dissolved with a few drops of concentrated  $\text{HNO}_3$ , and diluted to 50 mL with deionized water. The Ni and Al analyses were then performed by FAAS after appropriate dilutions with deionized water. According to the results obtained, the  $\text{Ni}^{2+}:\text{Al}^{3+}$  ratio (1.93:1) was in agreement with the expectations considering the proportion of metal salt precursors used in the LDH synthesis (2:1).

According to the results obtained, the adsorption of Cd(II) and Pb(II) ions onto the adsorbent may be attributed as follows: (i) contact between the target metal cations and the charge-compensating carbonate ion attached to the surface and edge and formation of the  $\text{CdCO}_3$  and  $\text{PbCO}_3$  precipitates (ii) substitution of the Ni(II) ions of the layers in the LDH structure with the Cd(II) and Pb(II) ions (iii) formation of the outer-sphere surface complexes  $\text{Sur-O} \cdots \text{Cd/Pb}$  between the metal ions and some deprotonated hydroxyl groups ( $\text{Sur-O}^-$ ) (iv) surface adsorption derived from the nature of cations (e.g. electronegativity). The results obtained show that the surface-induced precipitation is a major mechanism for the metal-cation adsorption by LDH, which occurs due to localized high pH values and the released carbonate ions available to the metal cations.

**Table 1S.** Analytical characteristics of proposed method for Cd<sup>2+</sup> and Pb<sup>2+</sup> ions in optimum conditions.

| Parameter                                   | Cd <sup>2+</sup>              | Pb <sup>2+</sup>               |
|---------------------------------------------|-------------------------------|--------------------------------|
| PF <sup>a</sup>                             | 80                            | 80                             |
| LDR <sup>b</sup>                            | 0.75-35                       | 4-370                          |
| LOD <sup>c</sup>                            | 0.25                          | 1.0                            |
| Intra-day precision<br>(RSD <sup>d</sup> %) | 3.4 (10 ng mL <sup>-1</sup> ) | 3.1 (50 ng mL <sup>-1</sup> )  |
|                                             | 3.2 (20 ng mL <sup>-1</sup> ) | 2.9 (100 ng mL <sup>-1</sup> ) |
| Inter-day precision<br>(RSD %)              | 6.0 (10 ng mL <sup>-1</sup> ) | 5.8 (50 ng mL <sup>-1</sup> )  |
|                                             | 5.6 (20 ng mL <sup>-1</sup> ) | 5.9 (100 ng mL <sup>-1</sup> ) |

<sup>a</sup> Preconcentration factor.

<sup>b</sup> Linear dynamic range (ng mL<sup>-1</sup>).

<sup>c</sup> Limit of detection (S/N = 3), (ng mL<sup>-1</sup>).

<sup>d</sup> Relative standard deviation (n = 5).

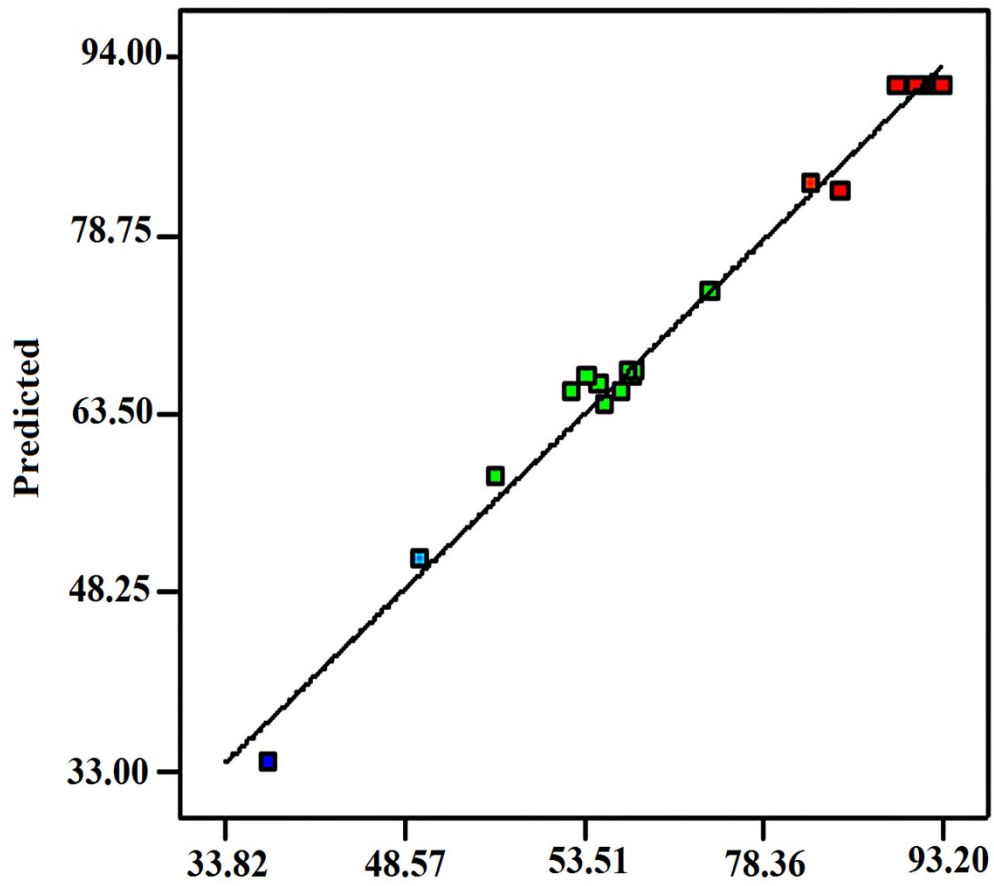

**Fig. 1S.** Plot of predicted values vs. actual values for the recovery (%) of Cd<sup>2+</sup> ions in the absorption step.

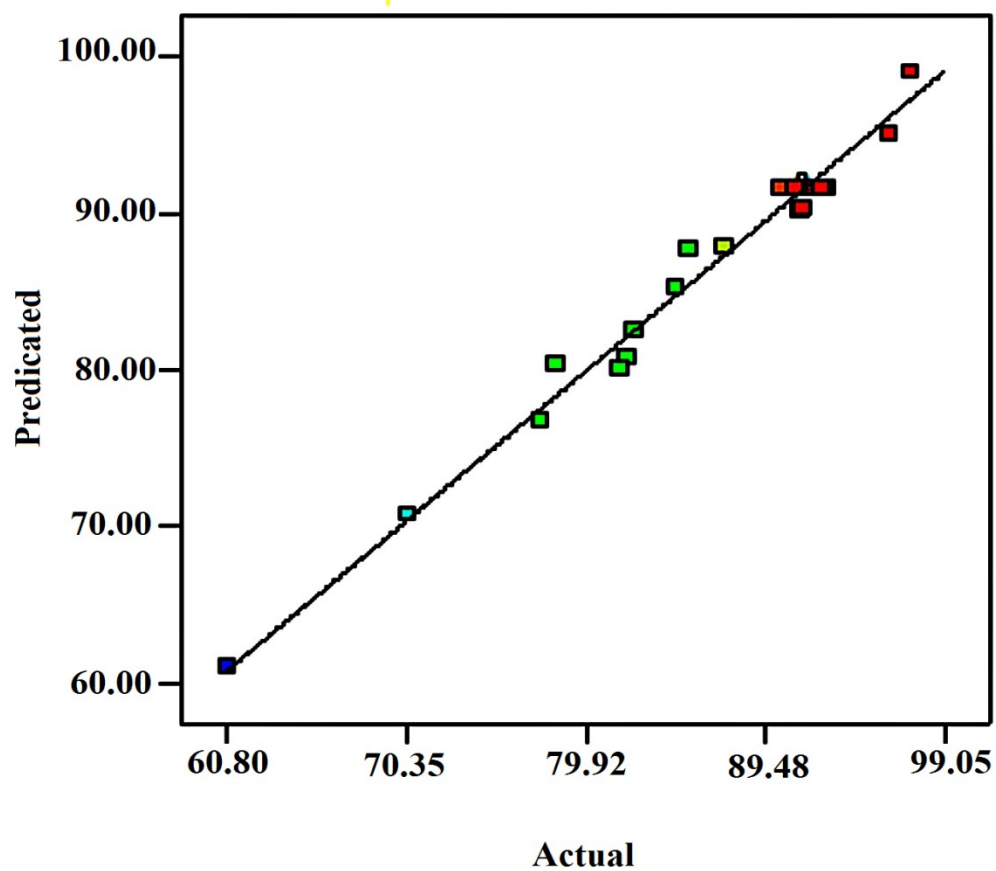

Fig. 2S. Plot of predicted values vs. observed values for the recovery (%) of Pb<sup>2+</sup> ions in the desorption step.

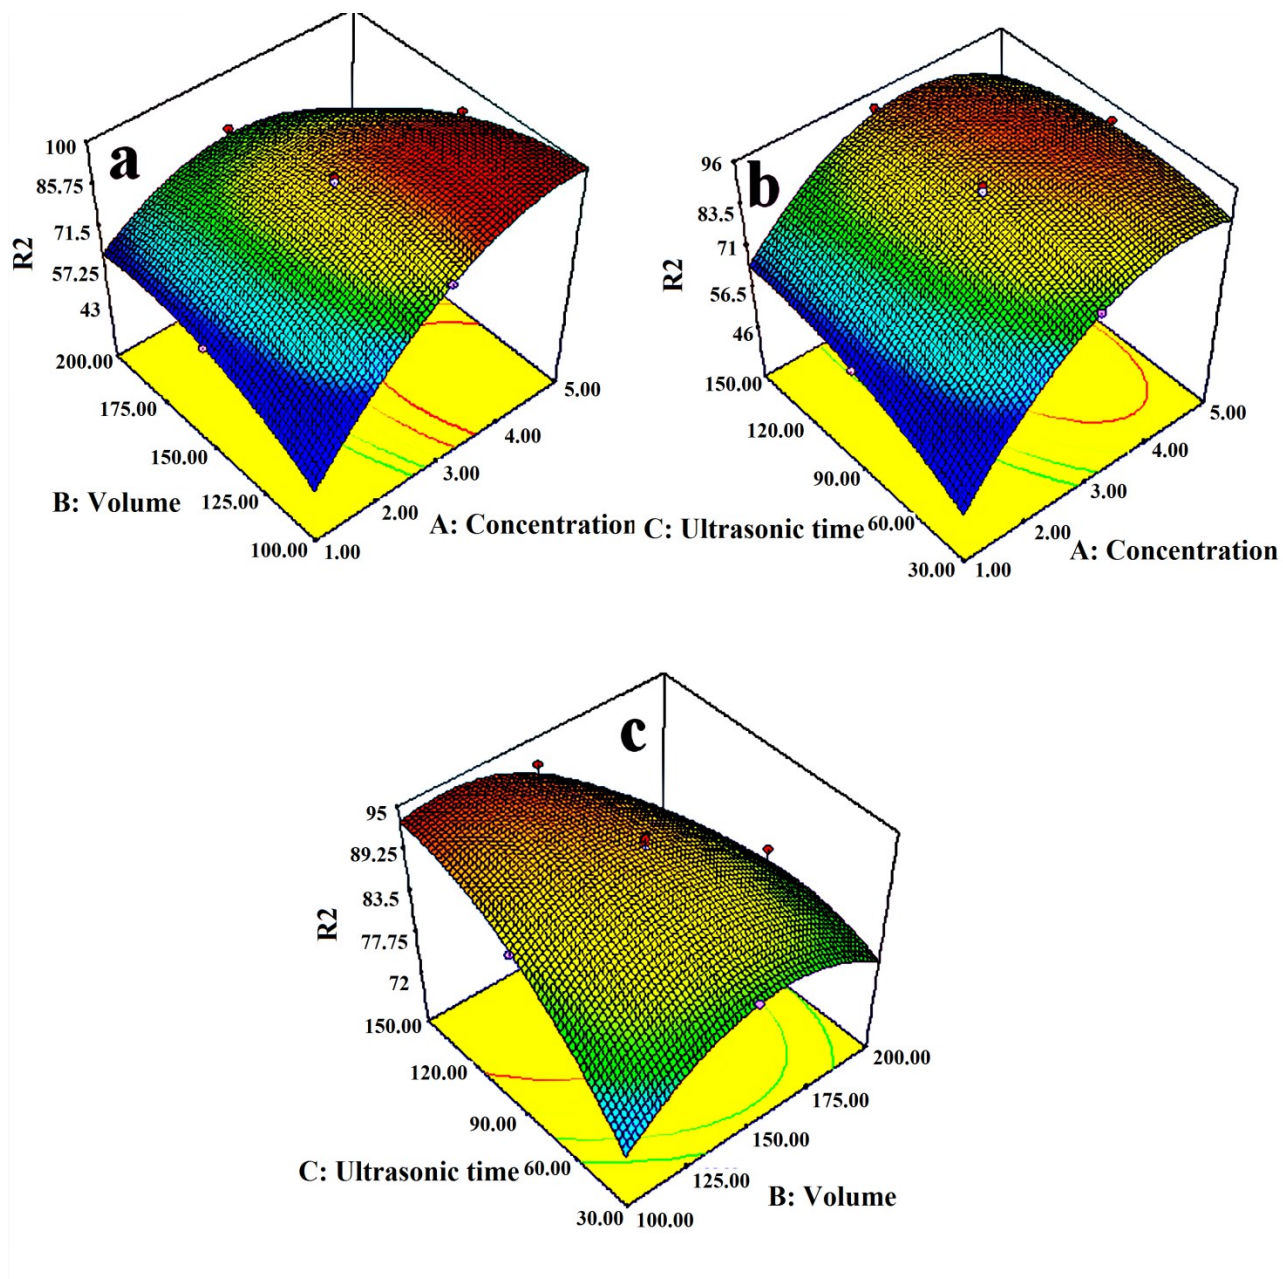

**Fig. 3S.** Response surfaces for Pb<sup>2+</sup> as a representative analyte in the desorption step: (a) concentration of eluent vs. volume of eluent; (b) concentration of eluent vs. ultrasonic time; (c) volume of eluent vs. ultrasonic time, respectively.
